# Supplementary material for: Impact of Blood Flow Restricted Training on Arterial Functions and Angiogenesis: A Systematic Review With Meta-analysis
Source: Preprints.org preprint supplement (doi:10.20944/preprints202305.0023.v1), 2023-05-01

Supplemental Figure 1. Graphs of risk of bias in accordance to Joanna Briggs Institute guidelines.

### A. Risk of bias in randomized control studies (n=13)

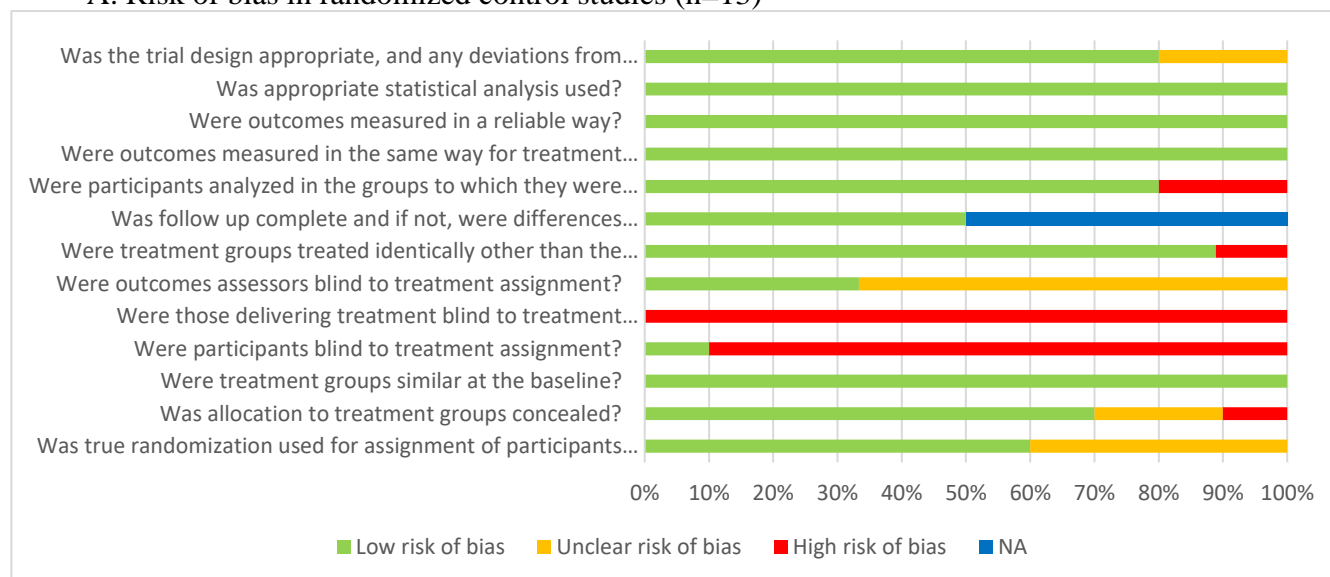

### B. Risk of bias in cross-over and cross-over-like studies (n=25)

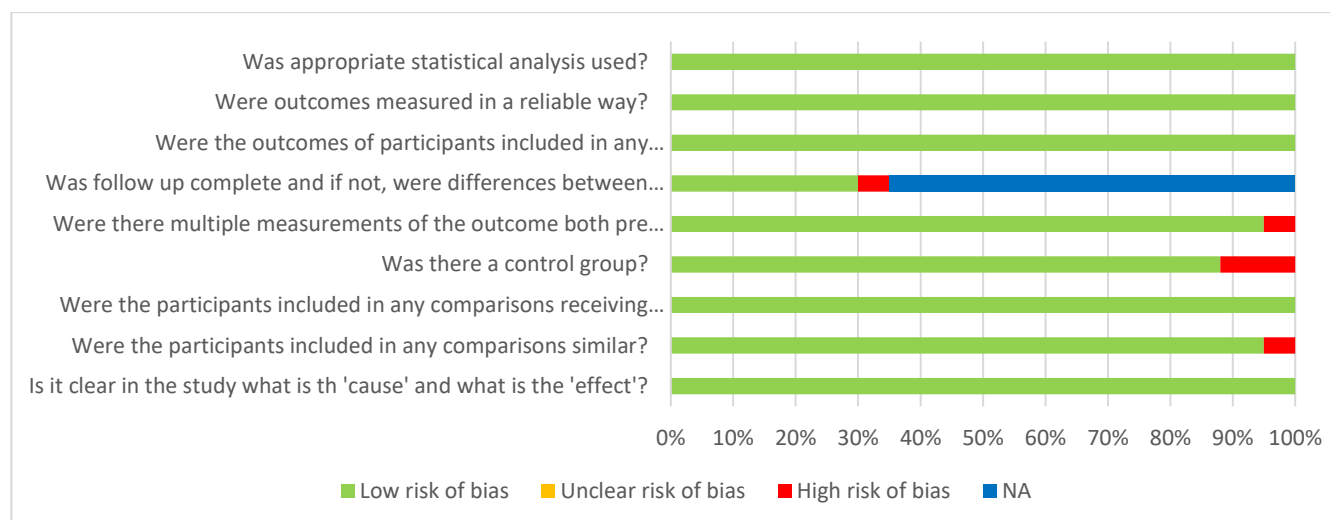

Supplement: Supplementary file 1 [file supplementary]
