# Supplementary material for: Impact of Blood Flow Restricted Training on Arterial Functions and Angiogenesis: A Systematic Review With Meta-analysis
Source: Preprints.org preprint supplement (doi:10.20944/preprints202305.0023.v1), 2023-05-01
Supplement: Supplementary file 2 [file supplementary]

| Number | Authors                | Title                                                                                                                                                               | Year | Journal                                                           | Volume, pages               | Country of the study | Type of the study          | Total number of participants | Number of participants in study group | Male [%] | Mean age (years +/-SD) | Population type                   | Type of the exercise           | Length of exercise (number of sessions, number of weeks) | Duration of 1 session (minutes) | Scheme of 1 session (number of repeats)                                                                 | Blood flow restriction time (minutes) | Blood flow restriction type | Name of the BFR tool           | Pressure used for BFR (mmHg)        | Control group training                                                                                                               | Which vascular and angiogenesis function parameters were assessed?  | Differences between pre-BFR and nonBFR groups in vascular parameters                                                 | Differences between pre-BFR and after-BFR in vascular parameters | Differences between after-BFR and nonBFR groups in blood pressure                                  | Differences between pre-BFR and after-BFR in blood pressure and heart rate |     |
|--------|------------------------|---------------------------------------------------------------------------------------------------------------------------------------------------------------------|------|-------------------------------------------------------------------|-----------------------------|----------------------|----------------------------|------------------------------|---------------------------------------|----------|------------------------|-----------------------------------|--------------------------------|----------------------------------------------------------|---------------------------------|---------------------------------------------------------------------------------------------------------|---------------------------------------|-----------------------------|--------------------------------|-------------------------------------|--------------------------------------------------------------------------------------------------------------------------------------|---------------------------------------------------------------------|----------------------------------------------------------------------------------------------------------------------|------------------------------------------------------------------|----------------------------------------------------------------------------------------------------|----------------------------------------------------------------------------|-----|
| 1      | Amorim S. et al.       | The Effect of a Single Bout of Resistance Exercise with Blood Flow Restriction on Arterial Stiffness in Older People with Slow Gait Speed: A Pilot Randomized Study | 2022 | Journal of Cardiovascular Development and                         | 9(3):85                     | Brazil               | RCT                        | 17                           | 10                                    | 17,60%   | 84.47                  | healthy, older                    | resistance exercise            | 1 single session                                         | N/A                             | 3 sets of 15 repeats (20% 1RM)                                                                          | N/A (during whole training)           | pressure cuff               | Kaatsu Nano                    | 150-260mmHg                         | Same but high resistance                                                                                                             | PWV<br>AI<br>A175                                                   | BFR<nonBFR<br>SBP: BFR = nonBFR HI: BFR<nonBFR                                                                       | -<br>=<br>=                                                      | SBP: BFR = nonBFR                                                                                  | +                                                                          |     |
| 2      | Barili A. et al.       | Acute responses of hemodynamic and oxidative stress parameters to aerobic exercise with blood flow restriction in hypertensive elderly women                        | 2018 | Molecular Biology Reports                                         | 45(5):1099-1109             | Brazil               | cross-over study           | 16                           | 16                                    | 0%       | 67.2 ± 3.7             | hypertensive women                | treadmill exercise             | N/D                                                      | N/D                             | N/D                                                                                                     | N/D                                   | pressure cuff               | regular sphygmomanometer cuffs | 130% resting SBP                    | Same low and high intensity                                                                                                          | NOx                                                                 | N/D                                                                                                                  | =                                                                | SBP: BFR = nonBFR HI: BFR<nonBFR                                                                   | +                                                                          |     |
| 3      | Barjaste A. et al.     | Concomitant aerobic- and hypertrophy-related skeletal muscle cell signaling following blood flow-restricted walking                                                 | 2021 | Science & Sports                                                  | 10.1016/j.scispo.2020.03.00 | Iran / France        | cross-over study           | 5                            | 5                                     | 100%     | 33.41 ± 1.02           | healthy, young                    | walking                        | 1 single session                                         | 10                              | N/A                                                                                                     | N/A                                   | 14                          | pressure cuff                  | Kaatsu-Master system                | 200 mmHg                                                                                                                             | Same training                                                       | VEGF                                                                                                                 | BFR<nonBFR                                                       | =                                                                                                  | N/A                                                                        | N/A |
| 4      | Beak H.J. et al.       | Effect of Low-Intensity Aerobic Training Combined with Blood Flow Restriction on Body Composition, Physical Fitness, and Vascular Responses in Recreational         | 2022 | Healthcare                                                        | 10(9):1789                  | South Korea          | RCT                        | 29                           | 14                                    | 100%     | 29.93 ± 3.96           | healthy, young, amateur sportsmen | treadmill exercise             | 3/week; 8 weeks                                          | 15                              | 10 minutes warm-up, 5*2 min cycling + 1min rest (40% VO2max)                                            | N/D                                   | pressure cuff               | Kaatsu Nano                    | 160-240mmHg                         | Same training                                                                                                                        | FMD<br>PWV<br>ABI                                                   | BFR<nonBFR<br>BFR<nonBFR<br>BFR<nonBFR                                                                               | N/D<br>N/D<br>N/D                                                | SBP: BFR = nonBFR                                                                                  | N/D                                                                        |     |
| 5      | Boeno F. P. et al.     | Acute effects of strength exercise with blood flow restriction on vascular function of young healthy males                                                          | 2018 | Jornal Vascular Brasileiro                                        | 17(2): 122-127              | Brazil               | cross-over study           | 11                           | 11                                    | 100%     | 23.72±3.49             | healthy, young                    | resistance exercise            | 1 single session                                         | N/A                             | Repeats up to fatigue of arms/legs                                                                      | N/A (during whole training)           | pressure cuff               | regular sphygmomanometer       | > 20mmHg; legs: SBP +               | Same low and high intensity                                                                                                          | NOx                                                                 | BFR<nonBFR<br>BFR<nonBFR HI                                                                                          | =                                                                | N/A                                                                                                | N/A                                                                        |     |
| 6      | Christiansen D. et al. | Blood flow-restricted training enhances thigh glucose uptake during exercise and muscle antioxidant function in humans                                              | 2019 | Metabolism: Clinical and Experimental                             | 98:1-15                     | Denmark              | n-RCT - experimental study | 13                           | 13                                    | 100%     | 25 ± 4.0               | healthy, young                    | cycling ergometer              | 1 single session                                         | 34                              | 5min warm-up, 9*2min high performance, 2*5min + 6*1min rest without resistance                          | 18                                    | pressure cuff               | sphygmomanometer cuffs         | 180mmHg                             | Same training on the other leg                                                                                                       | VEGF                                                                | BFR<nonBFR                                                                                                           | +                                                                | N/A                                                                                                | N/A                                                                        |     |
| 7      | Clark B. C. et al.     | Relative safety of 4 weeks of blood flow-restricted resistance exercise in young, healthy adults.                                                                   | 2011 | Scandinavian Journal of Medicine & of Medicine                    | 21: 653-662                 | USA                  | RCT                        | 16                           | 9                                     | 88%      | 23.96 ± 1.58           | healthy, young                    | resistance exercise            | 3/week; 4 weeks                                          | N/A                             | 3 series, 8-12 repeats each (30% 1RM)                                                                   | N/A (during whole training)           | pressure cuff               | E20 Rapid Cuff Inflator        | 130% resting SBP                    | Same training but 80% 1RM                                                                                                            | ABI<br>PWV                                                          | BFR<nonBFR<br>BFR<nonBFR                                                                                             | =                                                                | N/A                                                                                                | N/A                                                                        |     |
| 8      | Conceição M. S. et al. | Augmented Anabolic Responses after 8-wk Cycling with Blood Flow Restriction.                                                                                        | 2019 | Medicine and Science in Sports and Exercise                       | 51(1):84-93                 | Brazil               | RCT                        | 30                           | 10                                    | 100%     | 22.67 ± 2.67           | healthy, young                    | cycling ergometer              | 1/week; 8 weeks                                          | 30 (40% VO2)                    | N/A                                                                                                     | 30                                    | pressure cuff               | sphygmomanometer cuffs         | 80% resting SBP                     | Same endurance training but 70% VO2 or Resistance training (70% 1RM on leg press exercise - 4 sets of maximum repetitions)           | VEGF mRNA                                                           | BFR<nonBFR                                                                                                           | +                                                                | N/A                                                                                                | N/A                                                                        |     |
| 9      | Conceição M. S. et al. | Attenuated PGC-1α Isoforms following Endurance Exercise with Blood Flow Restriction.                                                                                | 2016 | Medicine and Science in Sports and Exercise                       | 48(8):1689-707              | Brazil               | cross-over study           | 9                            | 9                                     | 100%     | 22.4 ± 3.0             | healthy, young                    | cycling ergometer              | 1 single session                                         | 15 (40% VO2)                    | N/A                                                                                                     | 15                                    | pressure cuff               | sphygmomanometer cuffs         | 80% resting SBP                     | Same endurance training but 70% VO2 for 30 minutes or Resistance training (70% 1RM on leg press exercise - 4 sets of 10 repetitions) | VEGF mRNA                                                           | BFR<nonBFR                                                                                                           | =                                                                | N/A                                                                                                | N/A                                                                        |     |
| 10     | Credeur D. P. et al.   | Effects of handgrip training with venous restriction on brachial artery vasodilation.                                                                               | 2010 | Medicine and Science in Sports and Exercise                       | 42(7):1296-302              | USA                  | cross-over-like study      | 12                           | 12                                    | 41,67%   | 22 ± 1.0               | healthy, young                    | handgrip + forearm contraction | 3/week; 4 weeks                                          | 20                              | 15 repeats / 1 minute                                                                                   | 20                                    | pressure cuff               | sphygmomanometer cuffs         | 80mmHg                              | Same training                                                                                                                        | FMD                                                                 | BFR<nonBFR                                                                                                           | -                                                                | N/A                                                                                                | N/A                                                                        |     |
| 11     | Credeur D. P. et al.   | Central cardiovascular hemodynamic response to unilateral handgrip exercise with blood flow restriction.                                                            | 2019 | European Journal of Applied Physiology                            | 119(10):2255-2263           | USA                  | cross-over study           | 15                           | 15                                    | 100%     | 25 ± 2                 | healthy, young                    | handgrip                       | 1 single session                                         | (40% and 60% MA                 | 20 repeats / 1 minute                                                                                   | 5                                     | pressure cuff               | E20 Rapid Cuff Inflator        | 80-100mmHg                          | Same training with 60% MVC                                                                                                           | PWV<br>AI<br>RM                                                     | BFR Li<nonBFR<br>BFR Li<nonBFR<br>BFR Li<nonBFR                                                                      | +                                                                | HR: BFR Li<nonBFR HI<br>HR: BFR Li<nonBFR HI                                                       | +                                                                          |     |
| 12     | Early K.S. et al.      | Effect of blood flow restriction training on muscular performance, pain and vascular function                                                                       | 2020 | International Journal of Sports Physical                          | 15(6):892-900               | USA                  | RCT                        | 21                           | 11                                    | 38,10%   | 23.5 ± 4               | healthy, young                    | resistance exercise            | 20 session (2-3/week, 8 weeks)                           | N/A                             | 10-15 min warm-up, 5 exercise: 3 sets of 30                                                             | N/A (during whole training)           | elastic, pneumatic band     | BStrong Training SystemsTM     | 250mmHg (arms), 350mmHg (legs)      | Same but high resistance (60% 1RM)                                                                                                   | FMD                                                                 | BFR Li<nonBFR HI<br>BFR Li<nonBFR HI                                                                                 | +                                                                | SBP: BFR Li<nonBFR HI<br>HR: BFR Li<nonBFR HI<br>SBP: BFR Li<nonBFR HI                             | N/D<br>-<br>+                                                              |     |
| 13     | Fahs C. A. et al.      | Effect of different types of resistance exercise on arterial compliance and calf blood flow                                                                         | 2011 | European Journal of Applied Physiology                            | 111:2969-2975               | USA                  | cross-over study           | 11                           | 11                                    | 100%     | 28 ± 5                 | healthy, young                    | resistance exercise            | 1 single session                                         | N/A                             | 1 series of 30 repeats + 3 series of 15 repeats (20% 1RM)                                               | N/A (during whole training)           | pressure cuff               | Kaatsu-Master system           | 200mmHg                             | LI: 1 series of 30 repetitions + 3 series of 15 repetitions (20% 1RM)<br>HI: 3 series of 10 repetitions (70% 1RM)                    | SVR<br>LAEI<br>SAEI                                                 | BFR Li<nonBFR HI<br>BFR Li<nonBFR HI<br>BFR Li<nonBFR HI<br>BFR Li<nonBFR LI<br>BFR Li<nonBFR HI<br>BFR Li<nonBFR HI | -<br>=<br>+                                                      | ΔHR: BFR Li<nonBFR LI<br>ΔHR: BFR Li<nonBFR HI<br>ΔSBP: BFR Li<nonBFR LI<br>ΔSBP: BFR Li<nonBFR HI | +                                                                          |     |
| 14     | Fahs C. A. et al.      | Vascular adaptations to low-load resistance training with and without blood flow restriction.                                                                       | 2014 | European Journal of Applied Physiology                            | 114:715-724                 | USA                  | cross-over-like study      | 16                           | 16                                    | 68,80%   | 55 ± 7                 | healthy, midage                   | resistance exercise            | 3/week; 6 weeks                                          | N/A (30% 1RM)                   | 2 sets of 20 repeats / 1 minute for 1-2 weeks, 3-4 same sets for 3-4 weeks, 5-6 same sets for 5-6 weeks | N/A (during whole training + 15 sec)  | pressure cuff               | KaatsuMaster-mini system       | 150mmHg or <50%ΔE                   | Same training on the other leg                                                                                                       | PWV                                                                 | BFR<nonBFR                                                                                                           | +                                                                | N/A                                                                                                | N/A                                                                        |     |
| 15     | Ferguson R. A. et al.  | The acute angiogenic signalling response to low-load resistance exercise with blood flow restriction                                                                | 2018 | European Journal of Sport Science                                 | 18(3):397-406               | UK                   | cross-over study           | 6                            | 6                                     | 100%     | 26 ± 2                 | healthy, young                    | resistance exercise            | 1 single session                                         | N/A (20% 1RM)                   | 4 sets of 30 repeats (20repeats/1 min)                                                                  | N/A (during whole training + 15 sec)  | pressure cuff               | E20 Rapid Cuff Inflator        | 110mmHg                             | Same training                                                                                                                        | VEGF mRNA<br>VEGF-R2 mRNA<br>eNOS mRNA                              | BFR<nonBFR<br>BFR<nonBFR<br>BFR<nonBFR                                                                               | +                                                                | N/A                                                                                                | N/A                                                                        |     |
| 16     | Gustafsson T. et al.   | VEGF-A splice variants and related receptor expression in human skeletal muscle following submaximal exercise.                                                      | 2005 | Journal of Applied Physiology                                     | 98:2137-2146                | Sweden               | cross-over study           | 9                            | 9                                     | 100      | 22 (18-26)             | healthy, young                    | resistance exercise            | 1 single session                                         | 45                              | 60repeats / minute                                                                                      | 45                                    | pressure cuff               | regular pressure cuff          | 50 mmHg                             | same training without BFR                                                                                                            | VEGF-R1 mRNA<br>VEGF-R2 mRNA<br>VEGF-A mRNA                         | ΔBFR<ΔnonBFR<br>ΔBFR<ΔnonBFR<br>ΔBFR<ΔnonBFR                                                                         | +                                                                | N/A                                                                                                | N/A                                                                        |     |
| 17     | Hunt J. E. A. et al.   | Brachial artery modifications to blood flow-restricted handgrip training and detraining.                                                                            | 2012 | Journal of Applied Physiology                                     | 112:956-961                 | UK                   | cross-over-like study      | 9                            | 9                                     | 100      | 26 ± 4                 | healthy, young                    | resistance exercise            | 12 sessions, 4 weeks                                     | N/A                             | 3 sets of 20 contractions / minute (40% 1RM)                                                            | N/A (during whole training)           | pressure cuff               | regular pressure cuff          | 80 mmHg                             | same training without BFR                                                                                                            | FMD                                                                 | BFR<nonBFR                                                                                                           | =                                                                | N/A                                                                                                | N/A                                                                        |     |
| 18     | Kambit T. et al.       | Blood flow restriction resistance exercise improves muscle strength and hemodynamics, but not vascular                                                              | 2019 | Frontiers in Physiology                                           | 10:656                      | Slovenia             | RCT                        | 24                           | 12                                    | 75       | 60.5 ± 2.4             | CAD                               | resistance exercise            | 16 sessions, 8 weeks                                     | N/A                             | 3 sets (R, L, 16, 12 reps, +2 every session)                                                            | N/A (during whole training)           | pressure cuff               | regular pressure cuff          | SBP +15 to 20 mmHg                  | aerobic exercise training                                                                                                            | FMD                                                                 | BFR<nonBFR                                                                                                           | =                                                                | HR: BFR<nonBFR<br>SBP: BFR<nonBFR                                                                  | +                                                                          |     |
| 19     | Karabulut U. et al.    | Small arteries stay stiff for a longer period following vibration exercises in combination with blood flow restriction                                              | 2018 | ClinicalPhysiology and Functional Imaging                         | doi: 10.1111/cpf.12516.     | USA                  | cross-over study           | 8                            | 8                                     | 100      | 22.6 ± 2.2             | healthy, young                    | squats                         | 2 sessions                                               | N/A                             | 8 sets of 45s                                                                                           | 6 minutes                             | pressure cuff               | Kaatsu-Master                  | 144% SBP                            | same training without BFR                                                                                                            | SAEI<br>LAEI<br>SVR                                                 | BFR<nonBFR<br>BFR<nonBFR<br>BFR<nonBFR                                                                               | -                                                                | HR: BFR<nonBFR<br>SBP: BFR<nonBFR                                                                  | +                                                                          |     |
|        |                        |                                                                                                                                                                     |      |                                                                   |                             |                      |                            |                              |                                       |          |                        | push-ups                          | 2 sessions                     | N/A                                                      | 10 sets of 60s                  | 6                                                                                                       | pressure cuff                         | Kaatsu-Master               | 100 mmHg                       | same training without BFR           | SAEI<br>LAEI<br>SVR                                                                                                                  | BFR<nonBFR<br>BFR<nonBFR<br>BFR<nonBFR                              | -                                                                                                                    | HR: BFR<nonBFR<br>SBP: BFR<nonBFR                                | +                                                                                                  |                                                                            |     |
| 20     | Larkin K. A. et al.    | Blood flow restriction enhances post-resistance exercise angiogenic gene expression.                                                                                | 2012 | Medicine and Science in Sports and Exercise                       | 44:2077-2083                | USA                  | cross-over study           | 6                            | 6                                     | 50%      | 22 ± 1                 | healthy, young                    | resistance exercise            | 1 single session                                         | N/A                             | 10 sets of 12 repeats                                                                                   | N/A (during whole training)           | pressure cuff               | Kaatsu-Master Mini             | 220 mmHg                            | same training without BFR                                                                                                            | Serum VEGF<br>Muscle VEGF<br>VEGF mRNA<br>VEGF-R2 mRNA<br>eNOS mRNA | BFR<nonBFR<br>BFR<nonBFR<br>BFR<nonBFR<br>BFR<nonBFR<br>BFR<nonBFR                                                   | +                                                                | N/A                                                                                                | N/A                                                                        |     |
| 21     | Maga M. et al.         | Stimulation of the vascular endothelium and angiogenesis by blood flow restricted exercise                                                                          | 2022 | International Journal of Environmental Research and Public Health | 19(23):15859                | Poland               | cross-over study           | 35                           | 35                                    | 45,71%   | 24.29 ±2.44            | healthy, young                    | interval cross-trainer cycling | 1 single session                                         | 21                              | 9-minute warm-up (10% 1RM), 6 30-seconds-long sprints (20% 1RM) with 90-second cool-downs (10% 1RM).    | 21                                    | pressure cooling cuffs      | Vasper TM                      | 40mmHg (arms) and 65mmHg (legs)     | same training without BFR                                                                                                            | FMD<br>RHI<br>SI<br>RI<br>A175<br>VEGFR-2<br>PECAM-1 (CD31)<br>CD34 | BFR<nonBFR<br>BFR<nonBFR<br>BFR<nonBFR<br>BFR<nonBFR<br>BFR<nonBFR<br>BFR<nonBFR<br>BFR<nonBFR<br>BFR<nonBFR         | +                                                                | N/A                                                                                                | N/A                                                                        |     |
| 22     | Montgomery R. et al.   | Blood Flow Restriction Exercise Attenuates the Exercise-Induced Endothelial Progenitor Cell Response in Healthy, Young Men.                                         | 2019 | Frontiers in Physiology                                           | 0.727083333                 | UK                   | cross-over study           | 9                            | 9                                     | 100      | 21 ± 1                 | healthy, young                    | resistance exercise            | 1 single session                                         | N/A                             | 1 set of 30 repeats, 3 sets of 15 reps (20% 1RM)                                                        | N/A (during whole training)           | pressure cuff               | Hokanson CCL17 Thigh Cuff      | 60% of SBP, 5 mmHg in non-BFR group | same training without BFR                                                                                                            | CD34+CD45dim<br>CD34+VEGFR2+<br>CD34+CD45dimVEGFR2+                 | BFR<nonBFR<br>BFR<nonBFR<br>BFR<nonBFR                                                                               | =                                                                | N/A                                                                                                | N/A                                                                        |     |
| 23     | Paiva F. M. et al.     | Effects of disturbed blood flow during exercise on endothelial function: a time course analysis.                                                                    | 2016 | Brazilian Journal of Medical and Biological Research              | 49:e5100                    | Brazil               | cross-over-like study      | 9                            | 9                                     | 100      | 28 ± 5.8               | healthy, young                    | handgrip                       | 1 single session                                         | 20                              | 15 contractions / minute (60%MVC)                                                                       | 20                                    | pressure cuff               | E20 Rapid Cuff Inflator        | 80 mmHg                             | same training without BFR on other leg                                                                                               | FMD mm<br>FMD %<br>FMD%/AUC                                         | BFR<nonBFR<br>BFR<nonBFR<br>BFR<nonBFR                                                                               | =                                                                | N/A                                                                                                | N/A                                                                        |     |

|    |                           |                                                                                                                                                                  |      |                                                            |                 |          |                  |    |    |        |              |                         |                     |                              |                   |                                                                                                                                                                                                    |                                         |                                |                                                              |                                                                                              |                                                                                                                                                                                                                                                                   |                            |                                                                                                                                                                        |   |   |   |                                                                                                                                |     |
|----|---------------------------|------------------------------------------------------------------------------------------------------------------------------------------------------------------|------|------------------------------------------------------------|-----------------|----------|------------------|----|----|--------|--------------|-------------------------|---------------------|------------------------------|-------------------|----------------------------------------------------------------------------------------------------------------------------------------------------------------------------------------------------|-----------------------------------------|--------------------------------|--------------------------------------------------------------|----------------------------------------------------------------------------------------------|-------------------------------------------------------------------------------------------------------------------------------------------------------------------------------------------------------------------------------------------------------------------|----------------------------|------------------------------------------------------------------------------------------------------------------------------------------------------------------------|---|---|---|--------------------------------------------------------------------------------------------------------------------------------|-----|
| 24 | Patterson S. D. et al.    | Circulating hormone and cytokine response to low-load resistance training with blood flow restriction in older men.                                              | 2013 | European Journal of Applied Physiology                     | 113:713-719     | UK       | cross-over study | 7  | 7  | 100%   | 71.0 ± 6.5   | healthy, older          | resistance exercise | 1 single session             | min wysiuku + 12l | 5 sets (20 % 1-RM) unknown n of repeats                                                                                                                                                            | 8-10                                    | pressure cuffs                 | regular blood pressure cuffs                                 | 110 mmHg                                                                                     | same without BFR                                                                                                                                                                                                                                                  | VEGF                       | BFR:nonBFR<br>BFR:nonBFR<br>BFR:nonBFR                                                                                                                                 | + | + | + | N/A                                                                                                                            | N/A |
| 25 | Pinto R.R. et al.         | Haemodynamic responses during resistance exercise with blood flow restriction in hypertensive subjects                                                           | 2015 | Clinical Physiology and Functional Imaging                 | 36(5):407-13    | Brazil   | cross-over study | 12 | 12 | 0%     | 57 ± 7       | women with hypertension | resistance exercise | 1 single session             | N/A               | 3 sets of 15 repeats with 30s rest between sets (20% of 1 RM)                                                                                                                                      | N/A (during whole training)             | pressure cuffs                 | regular blood pressure cuffs                                 | 100% SBP                                                                                     | same without BFR and high resistance without BFR                                                                                                                                                                                                                  | SVR                        | BFR+ Li nonBFR<br>BFR+ Hi nonBFR                                                                                                                                       | = | = | = | SBP: BFR+ Li nonBFR<br>SBP: BFR+ Hi nonBFR<br>HR: BFR+ Li nonBFR<br>HR: BFR+ Hi nonBFR                                         | =   |
| 26 | Ramis T. R. et al.        | Effects of Traditional and Vascular Restricted Strength Training Program With Equalized Volume on Isometric                                                      | 2020 | Journal of Strength and Conditioning                       | 34:689-698      | Brazil   | RCT              | 28 | 15 | 100%   | 23.96 ± 2.67 | healthy, young          | resistance exercise | 3 session/week; 8 weeks      | N/A               | 4 sets, 21 repeats for arms + 23 for knees                                                                                                                                                         | N/A (during whole training + 2 minutes) | pressure cuff                  | N/D                                                          | - 20 mmHg; Leg: SBP +                                                                        | same training with high-load resistance without BFR                                                                                                                                                                                                               | FMD                        | BFR:nonBFR                                                                                                                                                             | + | + | + | N/A                                                                                                                            | N/A |
| 27 | Renzi C. P. et al.        | Effects of leg blood flow restriction during walking on cardiovascular function                                                                                  | 2010 | Medicine and Science in Sports and Exercise                | 42(4):726-32    | USA      | cross-over study | 17 | 17 | 64.70% | 26 ± 1       | healthy, young          | walking             | 1 single session             | 14                | 5 sets, 2 minutes each                                                                                                                                                                             | 17                                      | pressure cuff                  | sphygmomanometer cuffs                                       | 160mmHg                                                                                      | Same training                                                                                                                                                                                                                                                     | FMD/AUC                    | BFR:nonBFR                                                                                                                                                             | - | - | - | SBP: BFR:nonBFR                                                                                                                | =   |
| 28 | Shili D.D. et al.         | Experimental intermittent ischemia augments exercise-induced inflammatory cytokine production                                                                    | 2017 | Journal of Applied Physiology                              | 123:434-441     | USA      | cross-over study | 14 | 14 | 100%   | 21.8 ± 0.4   | healthy, young          | hand/rip            | 1 single session             | 30                | 20 repeats / 1 minute (65% 1RM)                                                                                                                                                                    | 30                                      | pressure cuff                  | Hokanson i20 cuff inflator                                   | 95% SBP                                                                                      | same without BFR                                                                                                                                                                                                                                                  | bFGF                       | BFR:nonBFR                                                                                                                                                             | + | + | + | N/A                                                                                                                            | N/A |
| 29 | Shimizu R. et al.         | Low-intensity resistance training with blood flow restriction improves vascular endothelial function and peripheral blood circulation in healthy elderly people. | 2016 | European Journal of Applied Physiology                     | 116:749-757     | Japan    | RCT              | 40 | 20 | 82.50% | 71 ± 4       | healthy, older          | resistance exercise | 3 sessions / week; 4 weeks   | 15                | 3 sets of 20 repeats                                                                                                                                                                               | 15                                      | pressure cuff                  | Tourmiquet 9000 VBM Medizinisch Gmbh                         | 100% SBP                                                                                     | same without BFR                                                                                                                                                                                                                                                  | VEGF                       | BFR:nonBFR                                                                                                                                                             | + | + | + | HR: BFR:nonBFR                                                                                                                 | +   |
| 30 | Stray-Gundersen S. et al. | Walking With Leg Blood Flow Restriction: Wide-Rigid Cuffs vs. Narrow-Elastic Bands.                                                                              | 2020 | Frontiers in Physiology                                    | 11:568          | USA      | cross-over study | 15 | 15 | 60%    | 23 ± 2       | healthy, young          | walking             | N/A                          | 15                | 5 sets of 2-min walking intervals (0.9 m/s, 1-min rest between sets)                                                                                                                               | 10                                      | pressure cuff or elastic bands | Pressure cuffs: Hokanson, CCL7; bands: BFR leg bands BStrong | cuff: 160 mmHg; band: 300 mmHg                                                               | same without BFR                                                                                                                                                                                                                                                  | FMD                        | BFR:nonBFR                                                                                                                                                             | + | + | + | SBP: BFR:nonBFR                                                                                                                | +   |
| 31 | Tai Y.L. et al.           | Hemodynamic response and pulse wave analysis after upper- and lower-body resistance exercise with and                                                            | 2021 | European Journal of Sport Science                          | 10:1-10         | USA      | cross-over study | 23 | 23 | 100%   | N/D          | healthy young           | resistance exercise | 1 single session             | N/A               | 4 sets of 30, 15, 15, and 15 repeats (30% 1RM)                                                                                                                                                     | N/D                                     | pressure cuff                  | N/D                                                          | N/D                                                                                          | same high resistance                                                                                                                                                                                                                                              | FMD                        | BFR:nonBFR                                                                                                                                                             | + | + | + | SBP: BFR:nonBFR                                                                                                                | +   |
| 32 | Takano H. et al.          | Hemodynamic and hormonal responses to a short-term low-intensity resistance exercise with the reduction of                                                       | 2005 | European Journal of Applied Physiology                     | 95:65-73        | Japan    | cross-over study | 11 | 11 | 100%   | 34 ± 6       | healthy, young          | resistance exercise | 1 single session             | N/A               | 4 sets of 30 repeats                                                                                                                                                                               | N/A                                     | pressure cuff                  | KAATSU Master                                                | 160-180 mmHg                                                                                 | same without BFR (only 9 participants; 2 LFU)                                                                                                                                                                                                                     | VEGF                       | BFR:nonBFR                                                                                                                                                             | + | + | + | SBP: BFR:nonBFR                                                                                                                | +   |
| 33 | Tangchaisuriya P. et al.  | Physiological Adaptations to High-Intensity Interval Training Combined with Blood Flow Restriction in Masters Road Cyclists                                      | 2022 | Medicine and Science in Sports and Exercise                | 54(5):830-840   | Thailand | RCT              | 50 | 17 | 100%   | 40.9 ± 4.3   | healthy, young cyclists | cycling ergometer   | 6 session/week for 12 weeks  | 32-120            | 120 min cycling 55%-60%PPO (2/week) + 75 min cycling 65%-70% PPO (2/week) + 2 repeats of 4 min interval 80% PPO, 2 BFR repeats of 60% PPO with 2 min 30% PPO and 10-min cool-down 25% PPO (2/week) | N/A (during whole training + 2 minutes) | pressure cuffs                 | regular blood pressure cuffs                                 | 30% SBP                                                                                      | LI: 120 min cycling 55%-60%PPO (2/week) + 75 min cycling 65%-70% PPO (2/week) or HI: 120 min cycling 55%-60%PPO (2/week) + 75 min cycling 65%-70% PPO (2/week) + 4 BFR repeats of 4 min interval 80% PPO with 2 min 30% PPO and 10-min cool-down 25% PPO (2/week) | FMD                        | BFR:nonBFR Li<br>BFR:nonBFR Hi<br>BFR:nonBFR Li<br>BFR:nonBFR Hi<br>BFR:nonBFR Li<br>BFR:nonBFR Hi<br>BFR:nonBFR Li<br>BFR:nonBFR Hi<br>BFR:nonBFR Li<br>BFR:nonBFR Hi | = | = | = | SBP: BFR:nonBFR-Li<br>SBP: BFR:nonBFR-Hi<br>SBP: BFR:nonBFR-Li<br>SBP: BFR:nonBFR-Hi<br>HR: BFR:nonBFR-Li<br>HR: BFR:nonBFR-Hi | =   |
| 34 | Wooten S. V. et al.       | Hemodynamic and Pressor Responses to Combination of Yoga and Blood Flow Restriction                                                                              | 2020 | International Journal of Sports Medicine                   | 41:759-765      | USA      | cross-over study | 20 | 20 | 50%    | 23 ± 4       | healthy, young          | yoga                | 1 single session             | 10                | 20 yoga poses                                                                                                                                                                                      | 10                                      | pressure cuffs                 | BStrong BFR                                                  | 250-300 mmHg                                                                                 | same without BFR                                                                                                                                                                                                                                                  | FMD                        | BFR:nonBFR                                                                                                                                                             | = | = | = | HR: BFR:nonBFR                                                                                                                 | +   |
| 35 | Yasuda T. et al.          | Effects of detraining after blood flow-restricted low-load elastic band training on muscle size and arterial stiffness in older women.                           | 2015 | SpringerPlus                                               | 4:348           | Japan    | RCT              | 14 | 7  | 0%     | 69.5 ± 6.5   | healthy, older          | resistance exercise | 2 sessions/week for 12 weeks | N/A               | 75 repeats                                                                                                                                                                                         | 9.5                                     | pressure cuffs                 | KAATSU Master                                                | 1st day - 120 mmHg +10mmHg for each next day up to 270 mmHg (mean pressure was 202 ± 8 mmHg) | same training without occlusion                                                                                                                                                                                                                                   | CAVI                       | BFR:nonBFR                                                                                                                                                             | = | = | = | HR: BFR:nonBFR                                                                                                                 | =   |
| 36 | Yasuda T. et al.          | Effects of Low-Load, Elastic Band Resistance Training Combined With Blood Flow Restriction on Muscle Size and Arterial Stiffness in Older Adults.                | 2015 | The Journals of Gerontology: Series A, Biological Sciences | 70:950-958      | Japan    | RCT              | 17 | 9  | 17.7%  | 70.01 ± 5.68 | healthy, older          | resistance exercise | 2 sessions/week; 12 weeks    | N/A               | 75 repeats                                                                                                                                                                                         | 11                                      | pressure cuff                  | KAATSU Master                                                | 180-270 mmHg                                                                                 | same without BFR                                                                                                                                                                                                                                                  | CAVI                       | BFR:nonBFR                                                                                                                                                             | = | = | = | SBP: BFR:nonBFR                                                                                                                | =   |
| 37 | Yasuda T. et al.          | Thigh muscle size and vascular function after blood flow-restricted elastic band training in older women                                                         | 2016 | Oncotarget                                                 | 7(23):33595-607 | Japan    | RCT              | 30 | 20 | 0%     | 70.0 ± 6.33  | healthy women           | resistance exercise | 2 sessions/week; 12 weeks    | N/A               | 75 repeats                                                                                                                                                                                         | 11                                      | pressure cuff                  | KAATSU Master                                                | 160-200 mmHg                                                                                 | no training                                                                                                                                                                                                                                                       | ABI                        | BFR-Hi-control<br>BFR-Li-control                                                                                                                                       | = | = | = | cSBP: BFR-Li-control<br>cSBP: BFR-Hi-control<br>cSBP: BFR-Li-control<br>cSBP: BFR-Hi-control                                   | =   |
| 38 | Zhao Y. et al.            | Eight weeks of resistance training with blood flow restriction improves cardiac function and vascular endothelial function in healthy young Asian males          | 2020 | International Health                                       | 13(5):471-479   | China    | RCT              | 24 | 8  | 100%   | 20.63 ± 0.88 | healthy, young          | resistance exercise | 5 sessions/week for 8 weeks  | N/A               | 20 repeats/min/set in 5 sets with a 2min break (30% 1RM)                                                                                                                                           | N/A (during whole training)             | pressure cuff                  | regular sphygmomanometer cuffs                               | 65% SBP<br>130% SBP                                                                          | same without BFR                                                                                                                                                                                                                                                  | VEGF-A<br>VEGF-A<br>VEGF-A | BFR-LP:nonBFR<br>BFR-LP:nonBFR<br>BFR-HP:nonBFR                                                                                                                        | + | + | + | HR BFR-LP:nonBFR<br>SBP BFR-LP:nonBFR<br>HR BFR-HP:nonBFR                                                                      | =   |
