# Supplementary material for: Impact of Blood Flow Restricted Training on Arterial Functions and Angiogenesis: A Systematic Review With Meta-analysis
Source: Preprints.org preprint supplement (doi:10.20944/preprints202305.0023.v1), 2023-05-01
Supplement: Supplementary file 3 [file supplementary]

Archive with 2 entries (2 files):
- Supplementary Table 1 - data extraction.pdf
- Supplementary Figure 1.pdf
